# Supplementary material
Source: Royal Society of Chemistry journal article supplement (doi:10.1039/d6tc00643d)
Supplement: d6tc00643d1.pdf [file d6tc00643d1.pdf]

## Supporting Information

### **Synergistic N-doped carbon encapsulation in porous CoSe<sub>2</sub> nanospheres for enhancing the anode performance of sodium-ion battery**

Xiaoyi Hou<sup>a, b\*</sup>, Ying He<sup>a</sup>, Dengdeng Ai<sup>a</sup>, Jianglong Kang<sup>a</sup>, Lijuan Ma<sup>a</sup>, Jiatai

Wang<sup>a, b</sup>

a. College of Physics and Electronic Information Engineering, Qinghai Normal University, Xining 810000, China

b. Qinghai Key Laboratory of Advanced Technology and Application of Environmental Functional Materials, Xining 810016, China

## **1. Synthesis of pure CoSe<sub>2</sub> microspheres CoSe<sub>2</sub>/C**

The pure CoSe<sub>2</sub> material was synthesized as follows: 1.5 g of Co(NO<sub>3</sub>)<sub>2</sub>·6H<sub>2</sub>O was dissolved in 50 mL of deionized water, labeled as solution A. 0.6 g of oxalic acid (H<sub>2</sub>C<sub>2</sub>O<sub>4</sub>) was dissolved in 50 mL of deionized water, labeled as solution B. Solution B was slowly added dropwise into solution A, and the mixture was stirred for 30 minutes to complete the precipitation. After centrifugation, the precipitate was dried at 80 °C overnight. The dried product was then calcined at 500 °C for 2 hours under air atmosphere to obtain a precursor. Subsequently, the precursor was selenized in the same manner as described above to obtain pure CoSe<sub>2</sub> material.

The CoSe<sub>2</sub>/C composite was synthesized as follows: 12 mmol of Co(NO<sub>3</sub>)<sub>2</sub>·6H<sub>2</sub>O and 27 mmol of glucose were dissolved in a mixed solution of deionized water (20 mL) and ethylene glycol (50 mL). After stirring for about 1 hour, the solution was transferred into an autoclave and placed in an oven at 125 °C for 12 hours. After the reaction, the product was collected by centrifugation, dried, and ground to obtain a precursor. The precursor was then calcined at 500 °C for 2 hours under an Ar atmosphere, followed by selenization to obtain the CoSe<sub>2</sub>/C composite.

## **2. Procedure for analyzing the thermogravimetric (TG) curve**

The TG analysis is based on the principle of cobalt element conservation. Under high-temperature calcination in air, CoSe<sub>2</sub> in the composite is completely oxidized to stable Co<sub>3</sub>O<sub>4</sub>, while the nitrogen-doped carbon, residual elemental selenium, and its oxides are completely removed as gaseous species, thus causing no interference with the residual solid mass. The core oxidation reaction is:

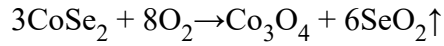

Based on the molar masses  $M(\text{CoSe}_2) = 216.85 \text{ g}\cdot\text{mol}^{-1}$ ,  $M(\text{Co}_3\text{O}_4) = 240.79 \text{ g}\cdot\text{mol}^{-1}$ , the conversion formula derived from the stoichiometric relationship is:

$$\omega(\text{Co}_3\text{O}_4) = \text{residual mass fraction} \cdot \frac{3M(\text{CoSe}_2)}{M(\text{Co}_3\text{O}_4)}$$

Using the final residual mass fractions measured by TG (29.7% for  $\text{CoSe}_2@\text{NC}-500$ , 27.6% for  $\text{CoSe}_2@\text{NC}-400$ , and 11.8% for  $\text{CoSe}_2@\text{NC}-300$ ), the  $\text{CoSe}_2$  contents were calculated to be 83.4 wt%, 69.3 wt%, and 66.4 wt%, respectively. Meanwhile, any trace elemental selenium impurity in the samples can be completely sublimed during the heating process, without affecting the reliability of the quantitative results.

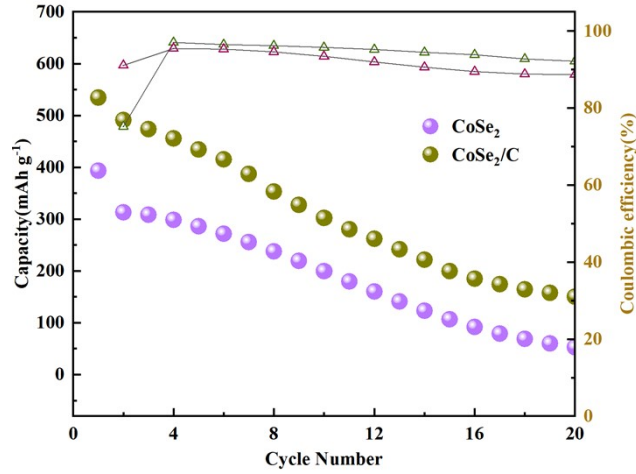

Fig. S1. Cycling performance of the two materials at 0.2 A g<sup>-1</sup>

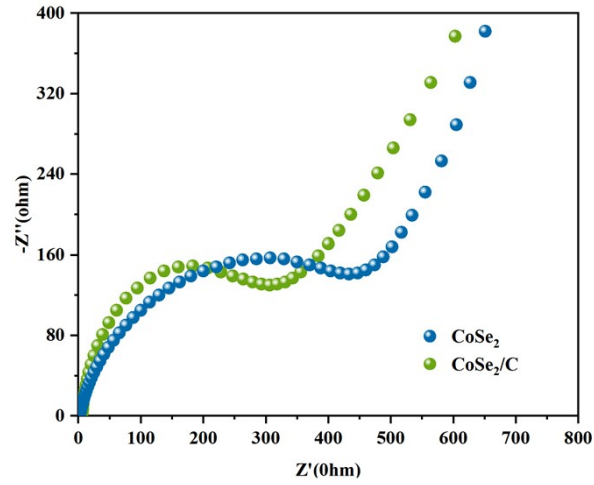

Fig. S2. EIS spectra of the CoSe<sub>2</sub> and CoSe<sub>2</sub>/C electrodes.

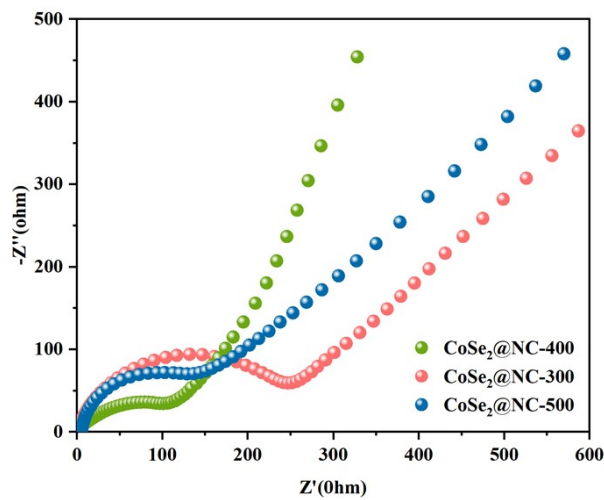

Fig. S3. EIS measurements of CoSe<sub>2</sub>@NC-300, CoSe<sub>2</sub>@NC-400 and CoSe<sub>2</sub>@NC-500 electrodes.

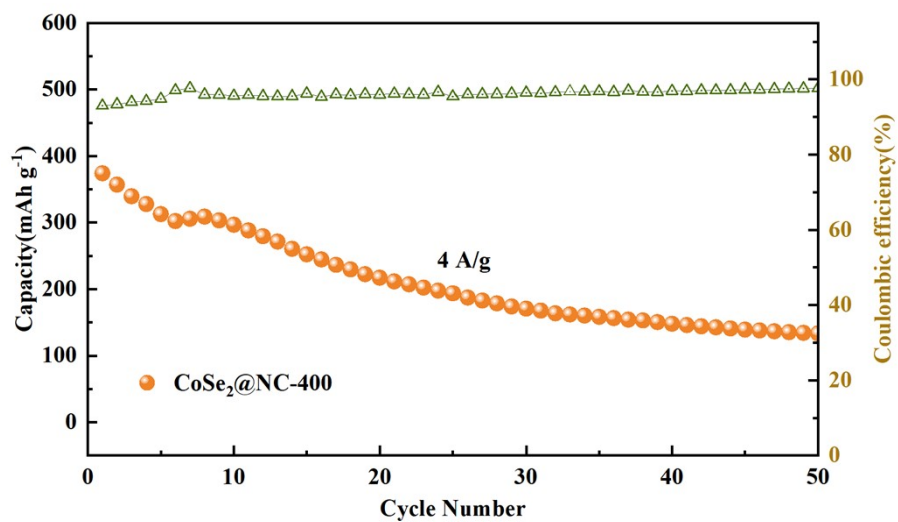

Fig. S4. Cycling performance of the CoSe<sub>2</sub>@NC-400 electrodes at 4 A g<sup>-1</sup>.

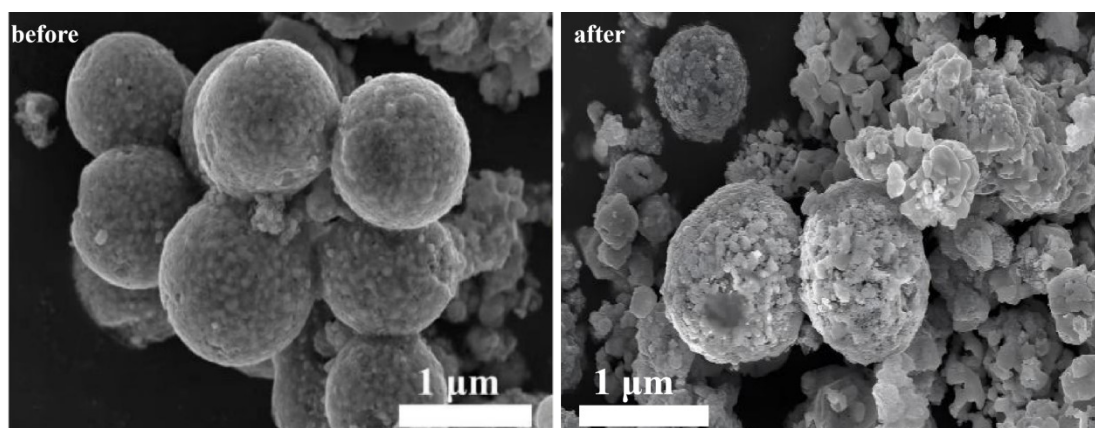

Fig. S5. SEM images of the CoSe<sub>2</sub>@NC-400 sample before and after cycling.

**Table S1.** ICE values of the CoSe<sub>2</sub>@NC electrode

|           | CoSe <sub>2</sub> @NC- | CoSe <sub>2</sub> @NC- | CoSe <sub>2</sub> @NC- |
|-----------|------------------------|------------------------|------------------------|
|           | 300                    | 400                    | 500                    |
| ICE value | 80.5%                  | 87.8%                  | 82.3%                  |

**Table S2.** Comparison of CoSe<sub>2</sub>@NC-400 in this work with other previously reported CoSex.

| Materials                 | Voltage range (V) | Current rate (mA g <sup>-1</sup> ) | ICE value (%) | References |
|---------------------------|-------------------|------------------------------------|---------------|------------|
| HS-CoSe <sub>2</sub> /NC  | 0.001-3           | 500                                | 83.7          | [1]        |
| N-CoSe <sub>2</sub> yss   | 0.01-3            | 200                                | 83.4          | [2]        |
| CoSe/G                    | 0.01-3            | 100                                | 55.7          | [3]        |
| CoSe <sub>2</sub> /N-CNFs | 0.5-3             | 2000                               | 67.4          | [4]        |
| CoSe <sub>2</sub> @PC     | 0.001-3           | 200                                | 84.4          | [5]        |
| CoSe <sub>2</sub> @NC     | 0.5-3             | 200                                | 87.8          | Our work   |

## References

- [1] Wen X, Li Y, Li Y, et al. Constructing robust interfaces in CoSe<sub>2</sub>/nitrogen-doped carbon for superior long-life sodium-ion storage[J]. Nano Letters, 2025, 25(5): 1956-1963.
- [2] Geng J, Zhang S, Ang EH, et al. Modulating the kinetics of CoSe<sub>2</sub> yolk-shell

spheres via nitrogen doping with high pseudocapacitance toward ultra-high-rate capability and high-energy density sodium-ion half/full batteries[J]. *Materials Chemistry Frontiers*. 2021, 5(18): 6873-82.

[3] Jiang Y, Xie M, Wu F, et al. Cobalt selenide hollow polyhedron encapsulated in graphene for high-performance lithium/sodium storage[J]. *Small*, 2021, 17(40): 2102893.

[4] Cui C, Wei Z, Zhou G, et al. Quasi-reversible conversion reaction of  $\text{CoSe}_2$ /nitrogen-doped carbon nanofibers towards long-lifetime anode materials for sodium-ion batteries[J]. *Journal of Materials Chemistry A*, 2018, 6(16): 7088-7098.

[5] Nie C, Ma T, Sun D, et al. Evolved yolk-shell structure from MOF-templated  $\text{CoSe}_2$  anchored onto carbon skeleton for long-life and high-rate sodium-ion batteries[J]. *Journal of Alloys and Compounds*, 2026: 187629.
